# Supplementary material for: Athletes Drive Distinctive Trends of COVID-19 Infection in a College Campus Environment
Source: MDPI journal article supplement (doi:10.3390/ijerph18147689), 2021-07-20
Supplement: s1 [file s1]

## Supplementary Material

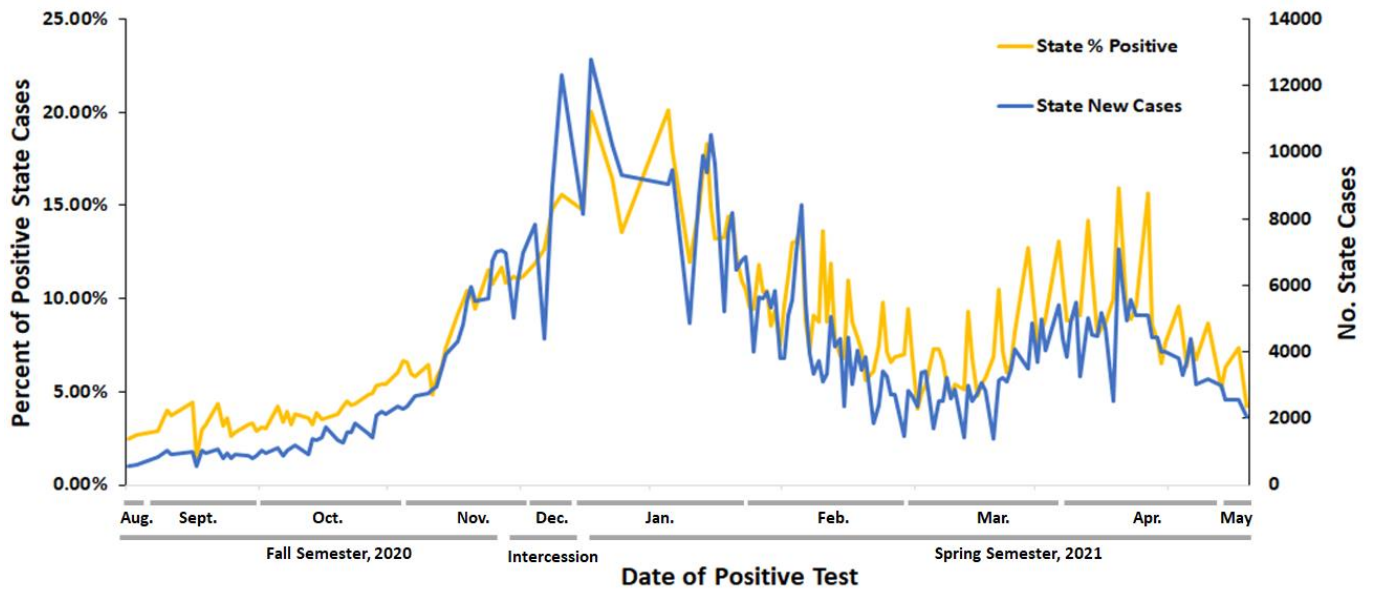

**Figure S1.** Temporal trends of percent and total COVID-19 infection at Gannon in Pennsylvania, United States.
